# Supplementary material for: The structural role and coordination environment of cobalt in 45P2O5–CaO–Na2O phosphate glasses: thermal properties and Raman, UV–vis-NIR, and EPR spectroscopy
Source: Royal Society of Chemistry journal article supplement (doi:10.1039/d3dt00279a), 2023-01-01
Supplement: d3dt00279a1.pdf [file d3dt00279a1.pdf]

† Supplementary information (ESI)

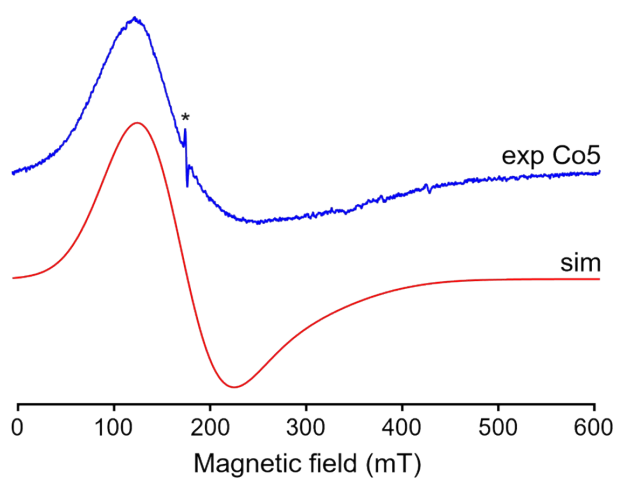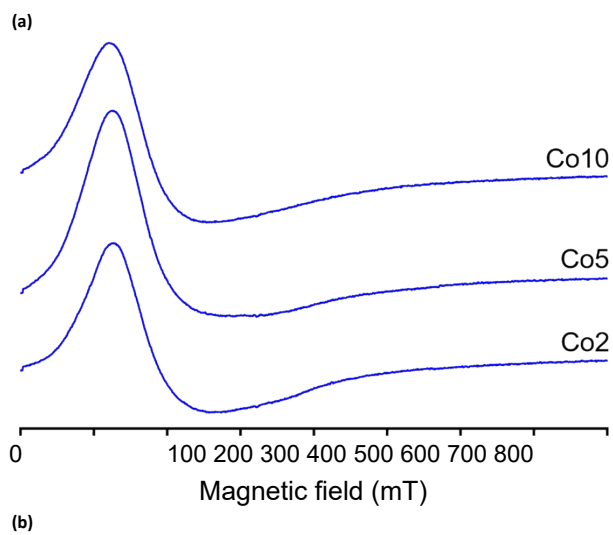

**Suppl. Fig. 1** (a) Experimental EPR spectrum of Co5 at 20 K and theoretical modelling ( $S = 3/2$ ,  $g = [2.2 \ 2.2 \ 2.4]$ ,  $\nu_{mw} = 9.78$  GHz,  $D \gg 0.3$  cm<sup>-1</sup>,  $E = 0$ ). Asterisk indicates a signal of resonator, useful for calibration. (b) Experimental EPR spectra of Co2, Co5 and Co10 glasses measured at 7 K in the same conditions.

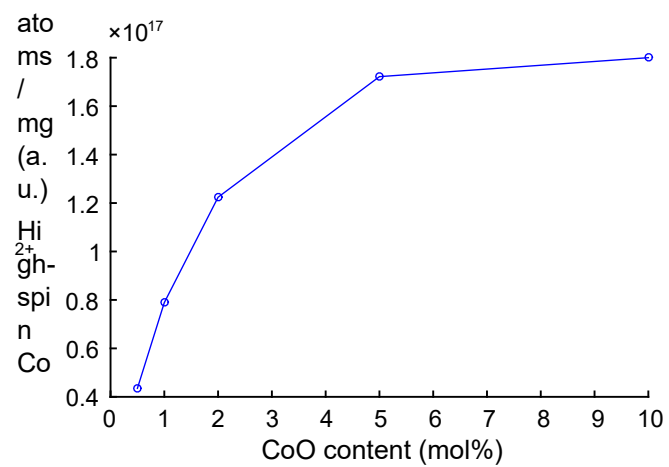

**Suppl. Fig. 2** The calculated EPR-based number of high-spin Co(II) atoms per mg vs. CoO mol%.
